# Supplementary material for: A strong–weak binary solvation structure for unimpeded low-temperature ion transport in nanoporous energy storage materials
Source: Royal Society of Chemistry journal article supplement (doi:10.1039/d3ta03100d), 2023-01-01
Supplement: d3ta03100d1.pdf [file d3ta03100d1.pdf]

1 **Supporting Information**

2

3 **Strong-Weak Binary Solvation Structure for Unimpeded Low-Temperature**

4 **Ion Transport in Nanoporous Energy Storage Materials**

5

6 Huachao Yang<sup>a,b</sup>, Zifan Wang<sup>a</sup>, Yiheng Qi<sup>a</sup>, Qinghu Pan<sup>a</sup>, Chuanzhi Zhang<sup>a</sup>, Yuhui Huang<sup>b,c</sup>,

7 Jianhua Yan<sup>a</sup>, Kefa Cen<sup>a</sup>, Guoping Xiong<sup>d</sup>, Zheng Bo<sup>\*a</sup>, and Kostya (Ken) Ostrikov<sup>e</sup>

8

9 <sup>a</sup> State Key Laboratory of Clean Energy Utilization, College of Energy Engineering, Zhejiang  
10 University, Hangzhou, Zhejiang, 310027, China

11 E-mail: [bozh@zju.edu.cn](mailto:bozh@zju.edu.cn)

12

13 <sup>b</sup> Research Institute of Zhejiang University-Taizhou, Taizhou, Zhejiang, 318000, China

14

15 <sup>c</sup> College of Materials Science and Engineering, Zhejiang University, Hangzhou, Zhejiang,  
16 310027, China

17

18 <sup>d</sup> Department of Mechanical Engineering, The University of Texas at Dallas, Richardson,  
19 Texas, TX 75080, United States

20

21 <sup>e</sup> School of Chemistry and Physics and QUT Centre for Materials Science, Queensland  
22 University of Technology (QUT), Brisbane, QLD 4000, Australia

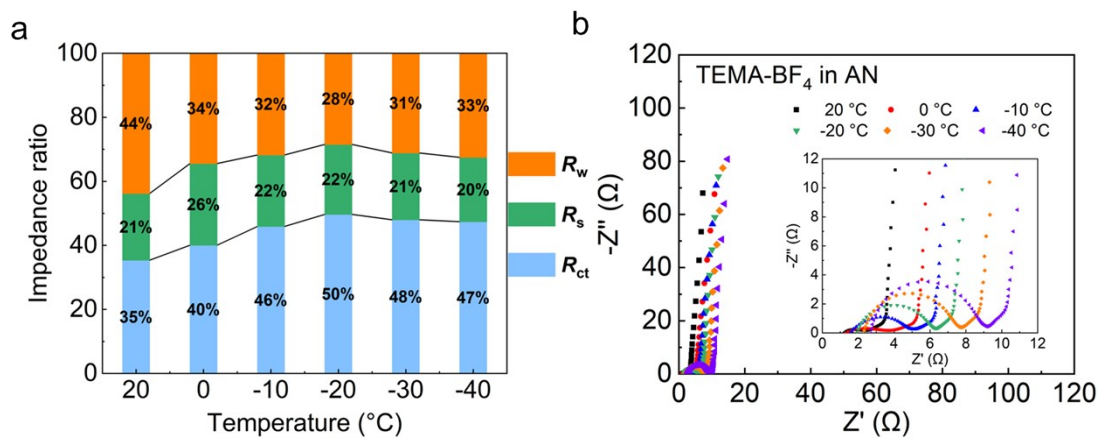

**Figure S1.** (a) Impedance ratio of  $R_s$ ,  $R_{ct}$ ,  $R_w$  in AN-based electrolyte under different temperatures. (b) Nyquist plots of AN-based electrolyte coin cell supercapacitors at different temperatures.

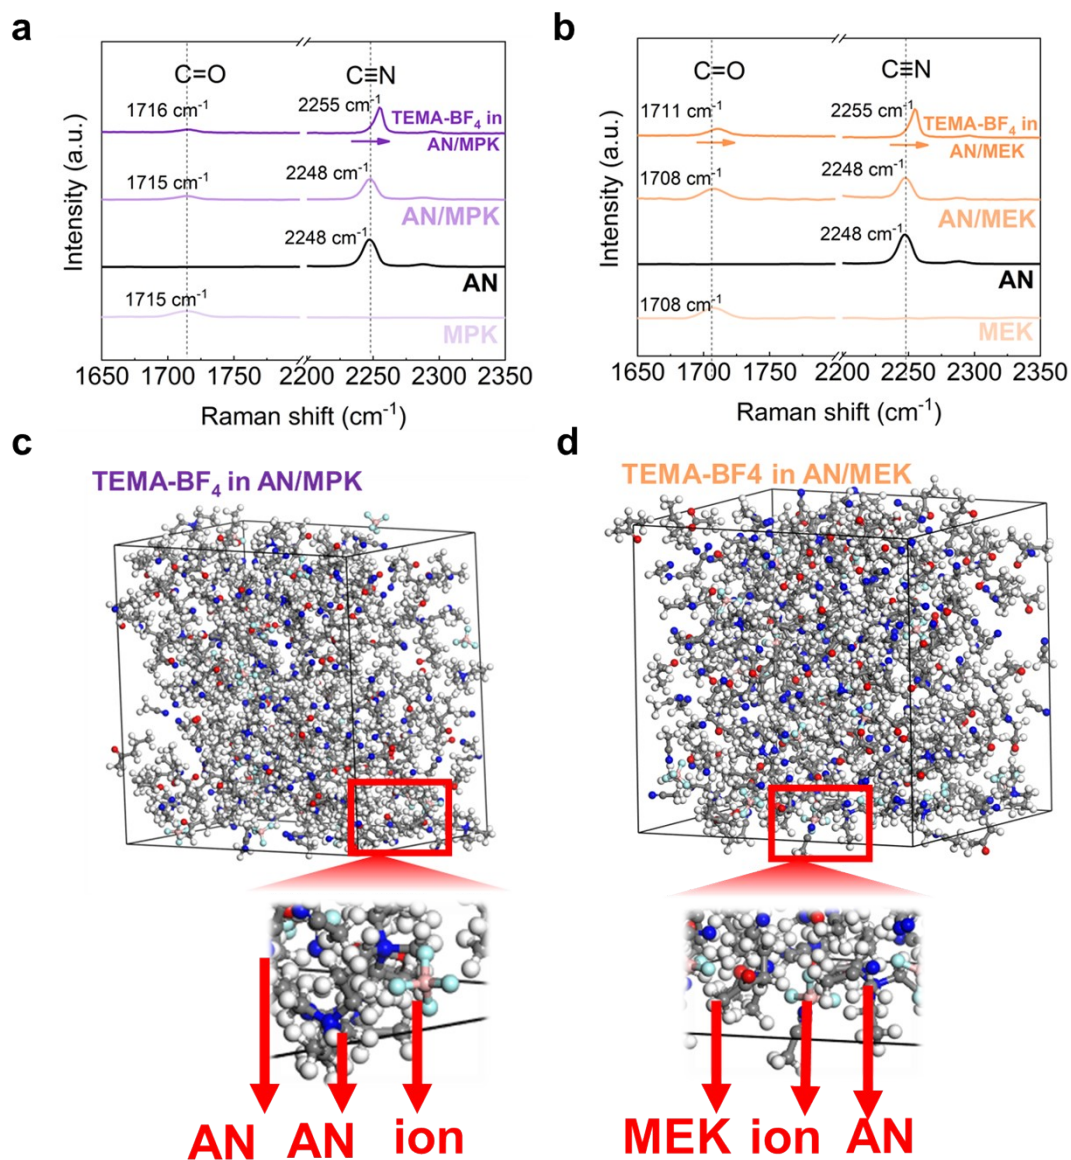

**Figure S2.** (a–b) Raman spectroscopy of single solvent (MPK, MEK, AN solvent), solvent mixtures (AN/MPK, AN/MEK), and electrolytes (TEMA-BF<sub>4</sub> in AN/MPK, AN/MEK). (c–d) Snapshots of molecular dynamics simulations. (Atom Colors: B, pink; C, grey; F, light blue; H, white; N, dark blue; O, red.)

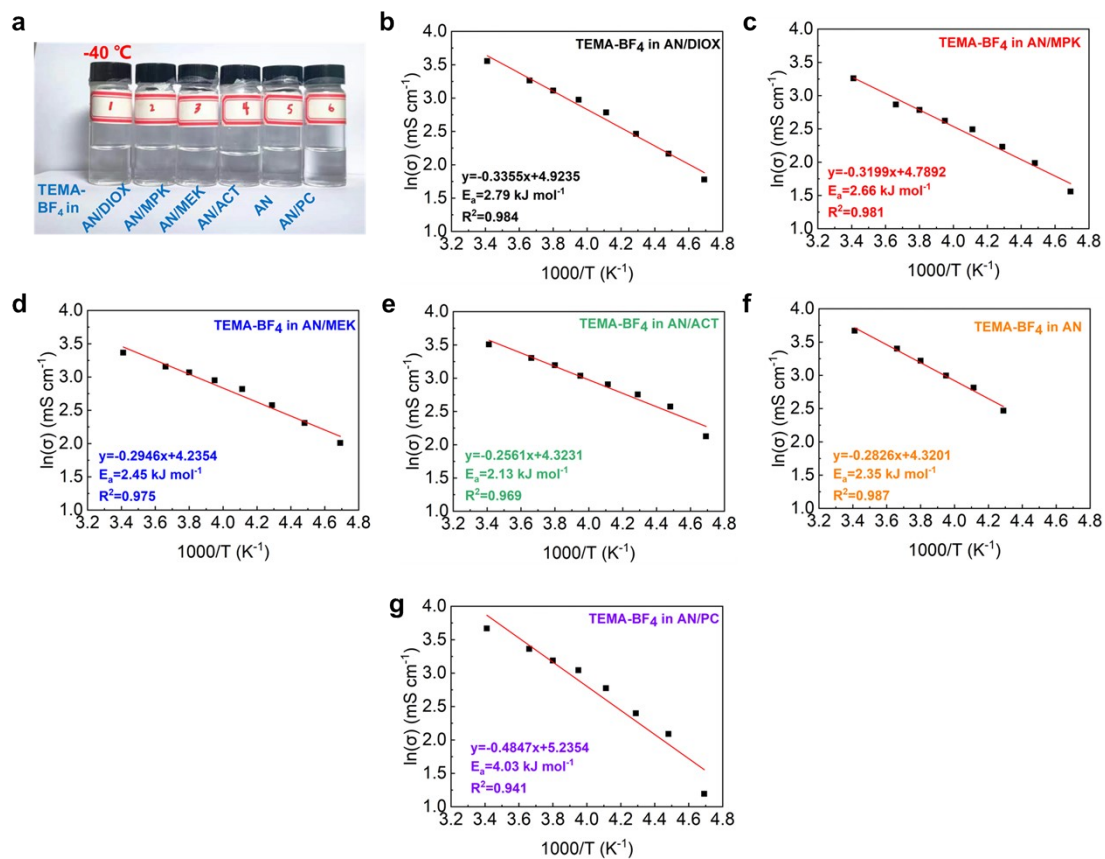

**Figure S3.** (a) Freezing tests of different electrolytes at  $-40\text{ }^{\circ}\text{C}$ . (b-g) Arrhenius plots of ionic conductivities of electrolytes.

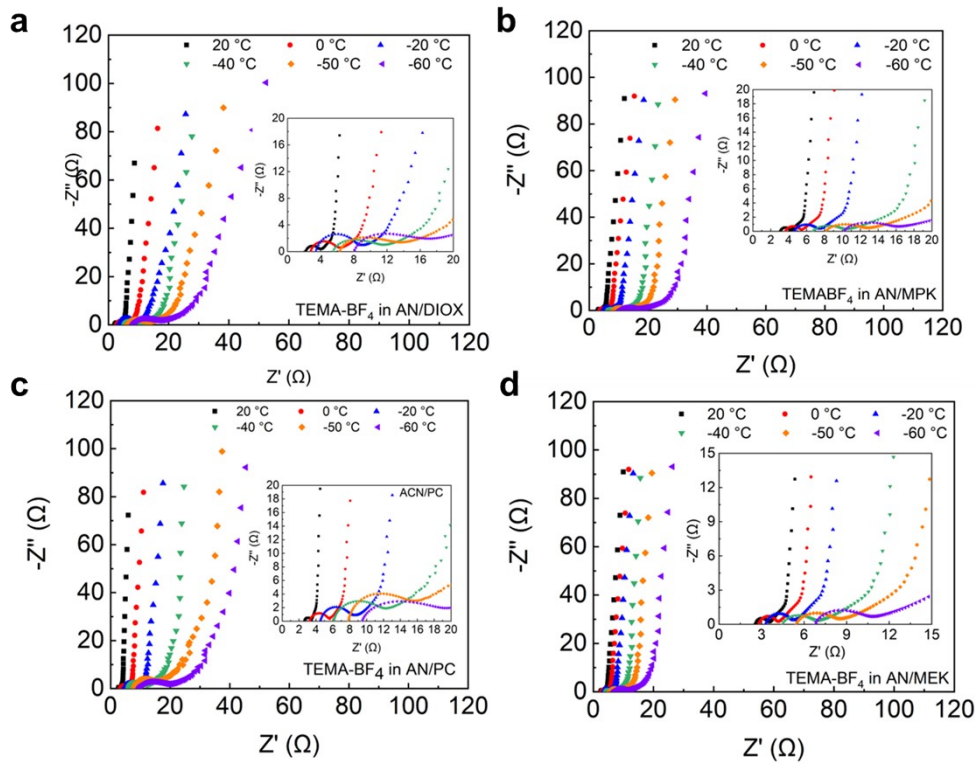

**Figure S4.** (a–d) Nyquist plots of different electrolytes based coin cell supercapacitors at different temperatures.

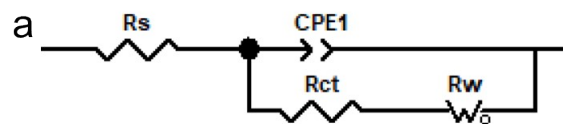

**Figure S5.** The corresponding equivalent circuit diagram of TEMA-BF<sub>4</sub> in AN/X-based coin cell supercapacitor. Here, X stands for DIOX, MPK, MEK, ACT and PC.

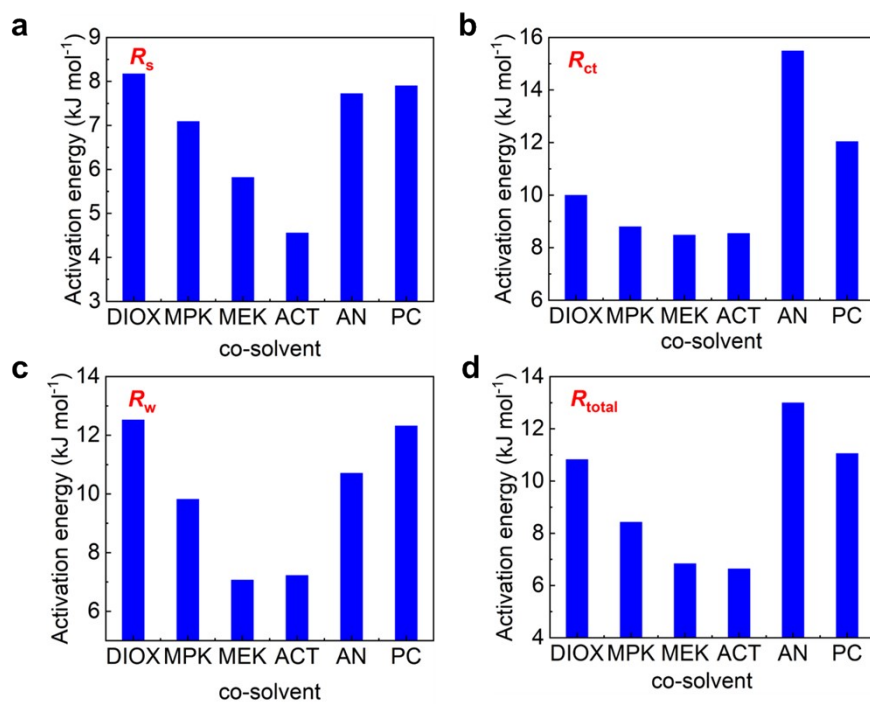

**Figure S6.** Activation energies of impedance in different co-solvent-based electrolytes.

The activation energies of (a)  $R_s$ , (b)  $R_{ct}$ , (c)  $R_w$  and (d)  $R$  in DIOX/MPK/MEK/ACT/PC co-solvent-based electrolytes.

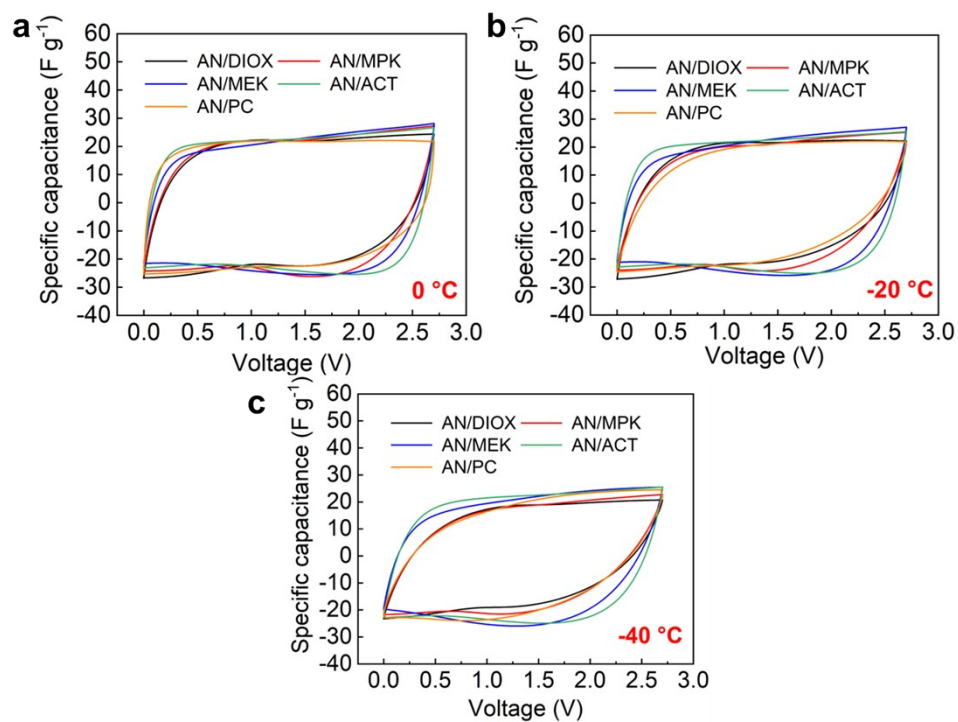

**Figure S7.** Cyclic voltammety plots of different electrolytes based coin cell supercapacitors at different temperatures.



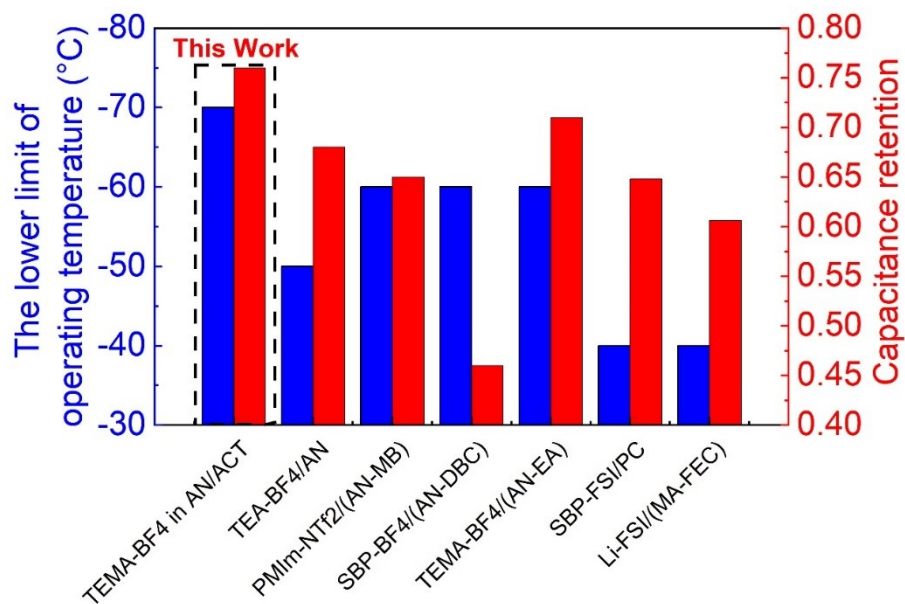

**Figure S8.** The lower limit of operating temperature and corresponding capacitance retention rate of TEMA-BF<sub>4</sub> in AN/ACT, TEA-BF<sub>4</sub>/AN, PMIm-NTf<sub>2</sub>/(AN-MB)<sup>[1]</sup>, SBP-BF<sub>4</sub>/(AN-DBC)<sup>[2]</sup>, TEMA-BF<sub>4</sub>/(AN-EA)<sup>[3]</sup>, SBP-FSI/PC<sup>[4]</sup>, Li-FSI/(MA-FEC)<sup>[5]</sup> electrolytes.

**Table S1.** Comparison of binding energy obtained from DFT calculation.

| Systems                     | Total    | Cation  | Anion   | E <sub>b</sub> (Ha) | E <sub>b</sub> (eV) |
|-----------------------------|----------|---------|---------|---------------------|---------------------|
| TEMABF <sub>4</sub>         | -757.63  | -332.96 | -424.60 | -0.060717           | -1.65               |
| TEMABF <sub>4</sub> -AN     | -890.62  | -332.96 | -557.60 | -0.051869           | -1.41               |
| TEMABF <sub>4</sub> -AN-ACT | -1084.10 | -332.96 | -751.09 | -0.043255           | -1.17               |
| TEMABF <sub>4</sub> -AN-AN  | -1123.47 | -332.96 | -790.46 | -0.043927           | -1.23               |
| TEMABF <sub>4</sub> -AN-PC  | -1272.90 | -332.96 | -939.89 | -0.045937           | -1.25               |

## References

- [1] X. Tang, D. Xiao, Z. Xu, Q. Liu, B. Ding, H. Dou, X. Zhang, *J. Mater. Chem. A* **2022**, *10*, 18374–18382;
- [2] F. Cheng, X. Yu, J. Wang, Z. Shi, C. Wu, *Electrochimica Acta* **2016**, *200*, 106–114;
- [3] R. R. Galimzyanov, S. V. Stakhanova, I. S. Krechetov, A. T. Kalashnik, M. V. Astakhov, A. V. Lisitsin, A. Y. Rychagov, T. R. Galimzyanov, F. S. Tabarov, *J. Power Sources* **2021**, *495*, 229442;
- [4] W. Zhang, J. Wang, D. Ruan, Q. Shi, F. Zhang, Q. Ren, Z. Shi, *Chem. Eng. J.* **2019**, *373*, 1012-1019
- [5] X. Meng, J. Qin, Y. Liu, Z. Liu, Y. Zhao, Z. Song, H. Zhan, *Chem. Eng. J.* **2023**, *465*, 142913.
